# Supplementary material
Source: PubMed Central journal article supplement (PMC3783092)

Web Figure – Adjusted hazard ratio (95% CI) of CHD per 1.03 mmol/L increase in total cholesterol stratified by hs-CRP group as measured at ARIC Visit 4 (1996-97).

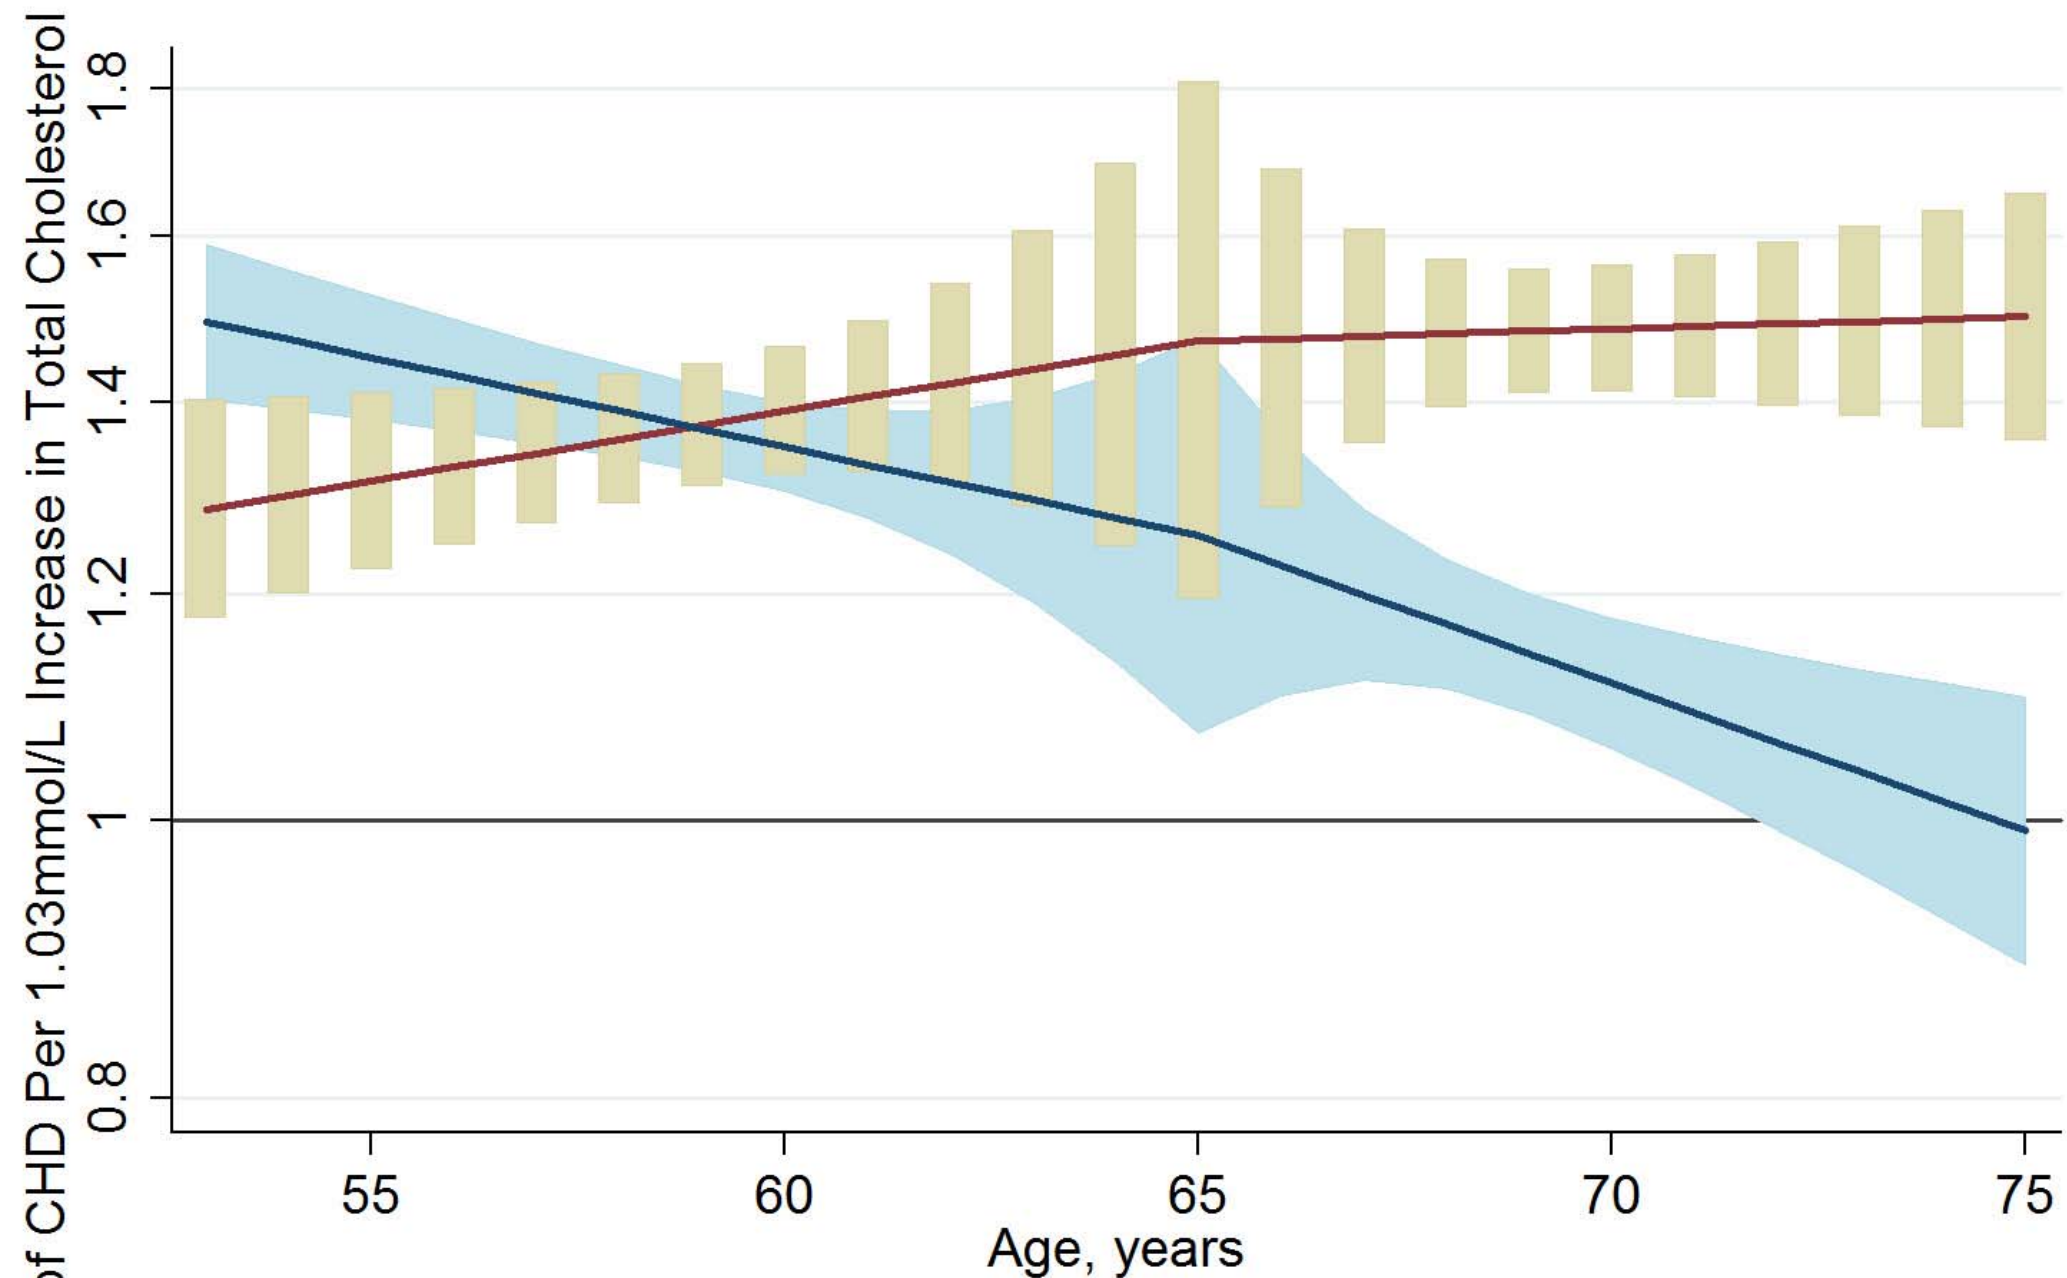

Supplement: supp_kwt086_kwt086supp.pdf [file supp_kwt086_kwt086supp.pdf]
